# Supplementary material for: Lassa viral dynamics in non-human primates treated with favipiravir or ribavirin
Source: PLOS journal article supplement (doi:10.1371/journal.pcbi.1008535), 2021-01-07
Supplement: S11 (10.1371/journal.pcbi.1008535.s011) [file journal.pcbi.1008535.s011]

| Immune response | Refractory with<br>density dependent term | No immune<br>response | Refractory without<br>F compartment |
|-----------------|-------------------------------------------|-----------------------|-------------------------------------|
| BIC             | 490.70                                    | 507.33                | 496.63                              |

**Table S3. F compartment assessment.** Refractory model with FPV and RBV mutagen agents,  $\kappa=1$
